# Supplementary material for: Two novel derivatives of ammonia borane for hydrogen storage: synthesis, structure, and hydrogen desorption investigation
Source: Royal Society of Chemistry journal article supplement (doi:10.1039/c3ta11988b), 2013-01-01
Supplement: c3ta11988b.pdf [file c3ta11988b.pdf]

Electronic Supporting Information  
**Two novel derivatives of ammonia borane for hydrogen  
storage: synthesis, structure, and hydrogen desorption  
investigations**

**Leigang Li,<sup>a,b</sup> Qinfen Gu,<sup>c</sup> Ziwei Tang,<sup>b</sup> Xiaowei Chen,<sup>b</sup> Yingbin Tan,<sup>b</sup> Qian Li,<sup>\*a</sup>  
Xuebin Yu<sup>\*b</sup>**

<sup>a</sup>*Shanghai Key Laboratory of Modern Metallurgy & Materials Processing, Shanghai University,  
Shanghai, 200072, China.*

<sup>b</sup>*Department of Materials Science, Fudan University, Shanghai, 200433, China.*

<sup>c</sup>*Australian Synchrotron, 800 Blackburn Rd, Clayton, 3168, Australia.*

<sup>a</sup>*Shanghai Key Laboratory of Modern Metallurgy & Materials Processing, Shanghai University,  
Shanghai, 200072, China.*

*Tel. & Fax: +86-21-56338065; E-mail: [shuliqian@shu.edu.cn](mailto:shuliqian@shu.edu.cn).*

<sup>b</sup>*Department of Materials Science, Fudan University, Shanghai, 200433, China.*

*Tel.: +86-21-55664581; E-mail: [yuxuebin@fudan.edu.cn](mailto:yuxuebin@fudan.edu.cn);*

**Table S1** Atomic coordinates of 1,3-TMDAB

| Atom | Wyck. | x/a     | y/b     | z/c     |
|------|-------|---------|---------|---------|
| C10  | 4a    | 0.61938 | 0.29406 | 0.26431 |
| C15  | 4a    | 0.72657 | 0.21651 | 0.23652 |
| C16  | 4a    | 0.81714 | 0.33123 | 0.26460 |
| N10  | 4a    | 0.52940 | 0.18532 | 0.23588 |
| N15  | 4a    | 0.92181 | 0.25932 | 0.22770 |
| B10  | 4a    | 0.41517 | 0.26542 | 0.24067 |
| B15  | 4a    | 0.02064 | 0.37401 | 0.23593 |
| H10  | 4a    | 0.53938 | 0.12836 | 0.11015 |
| H20  | 4a    | 0.53387 | 0.09942 | 0.33613 |
| H30  | 4a    | 0.61139 | 0.34142 | 0.40484 |
| H40  | 4a    | 0.60903 | 0.39036 | 0.16650 |
| H50  | 4a    | 0.41551 | 0.36700 | 0.12135 |
| H60  | 4a    | 0.40271 | 0.32564 | 0.39165 |
| H70  | 4a    | 0.34853 | 0.16693 | 0.20809 |
| H15  | 4a    | 0.91889 | 0.20752 | 0.09745 |
| H25  | 4a    | 0.93397 | 0.16853 | 0.31963 |
| H35  | 4a    | 0.73061 | 0.16856 | 0.09518 |
| H45  | 4a    | 0.73511 | 0.11866 | 0.33363 |
| H55  | 4a    | 1.00753 | 0.47167 | 0.11379 |
| H65  | 4a    | 0.02115 | 0.43785 | 0.38706 |
| H75  | 4a    | 0.10103 | 0.29884 | 0.20970 |
| H36  | 4a    | 0.81873 | 0.37522 | 0.40727 |
| H46  | 4a    | 0.80955 | 0.43121 | 0.17131 |

**Table S2** Kinetic modeling information of 1,2-TMDAB fitted by nucleation and growth model

| Temperature | $[-\ln(1-\alpha)]^{2/3}=kt$ |        |        |
|-------------|-----------------------------|--------|--------|
|             | t (min)                     | k      | $r^2$  |
| 100°C       | ≤10.50                      | 0.0544 | 0.9984 |
| 110°C       | ≤6.50                       | 0.1261 | 0.9970 |
| 120°C       | ≤7.06                       | 0.1490 | 0.9922 |
| 130°C       | ≤5.66                       | 0.2032 | 0.9928 |

**Table S3** Kinetic modeling information of 1,2-TMDAB fitted by diffusion model

| Temperature | $1 - \left(1 - \sqrt{\frac{t}{t_c}}\right)^3$ |       |        |
|-------------|-----------------------------------------------|-------|--------|
|             | t (min)                                       | $t_c$ | $r^2$  |
| 100°C       | >10.50                                        | 126.6 | 0.9566 |
| 110°C       | >6.50                                         | 118.1 | 0.9817 |
| 120°C       | >7.06                                         | 87.8  | 0.9471 |
| 130°C       | >5.66                                         | 82.2  | 0.8745 |

**Table S4** Kinetic modeling information of 1,3-TMDAB fitted by nucleation and growth model

| Temperature | $[-\ln(1-\alpha)]^r = kt$ |     |        |                |
|-------------|---------------------------|-----|--------|----------------|
|             | t (min)                   | r   | k      | R <sup>2</sup> |
| 100°C       | ≤60                       | 3/2 | 0.0120 | 0.9988         |
| 110°C       | ≤13.69                    | 1   | 0.0461 | 0.9973         |
| 120°C       | ≤10.36                    | 1   | 0.0852 | 0.9747         |
| 130°C       | ≤10.97                    | 1   | 0.1007 | 0.9993         |

**Table S5** Kinetic modeling information of 1,3-TMDAB fitted by diffusion model

| Temperature | $1 - \left(1 - \sqrt{\frac{t}{t_c}}\right)^3$ |       |        |
|-------------|-----------------------------------------------|-------|--------|
|             | t (min)                                       | $t_c$ | $r^2$  |
| 100°C       | --                                            | --    | --     |
| 110°C       | >13.69                                        | 464.2 | 0.6823 |
| 120°C       | >10.36                                        | 247.7 | 0.5286 |
| 130°C       | >10.97                                        | 119.6 | 0.9917 |

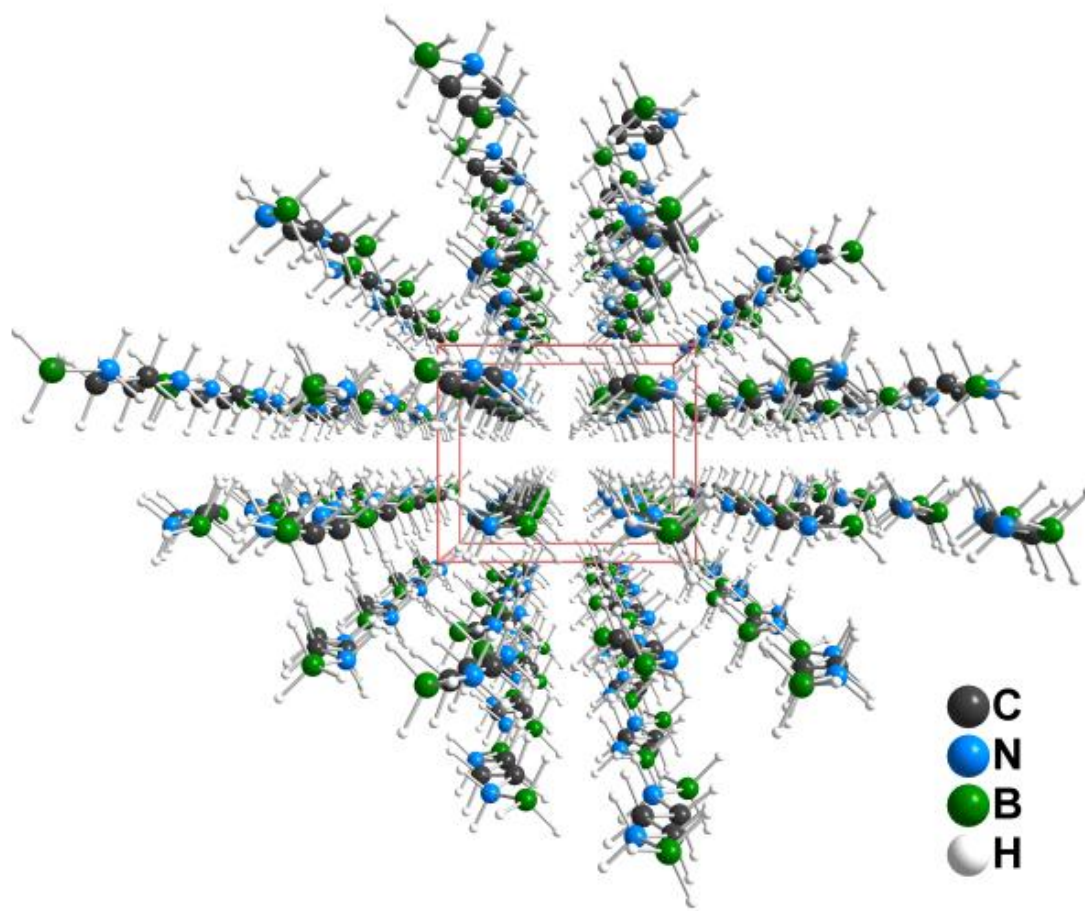

**Fig. S1** 3-D crystal structure of 1,3-TMDAB.

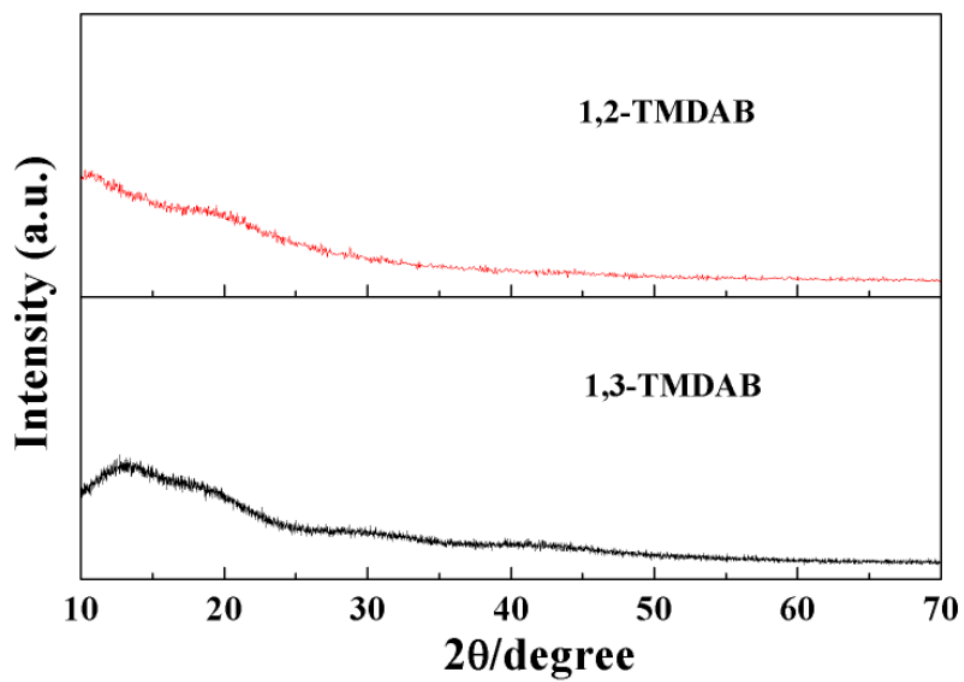

**Fig. S2** XRD patterns of the decomposed products of 1,2-TMDAB and 1,3-TMDAB heated to 250 °C.
